# Supplementary material
Source: publisher figshare collection journal article supplement (https://tandf.figshare.com/articles/dataset/_/8286233)
Supplement: Supplementary file 1 [file 2]

## Coastal mafic dykes, NSW, emplaced before and during the opening of the Tasman Sea – source implications

R. Offler<sup>a</sup>, H. Zwingmann<sup>b</sup>, J. Foden<sup>c</sup>, F. L. Sutherland<sup>d</sup> and I. T. Graham<sup>d,e</sup>

<sup>a</sup>NSW Institute of Frontiers Geoscience, School of Environmental & Life Sciences, University of Newcastle, NSW 2308, Australia; <sup>b</sup>Department of Geology and Mineralogy, Kyoto University, Kyoto, Japan; <sup>c</sup>Geology and Geophysics, School of Earth and Environmental Science, University of Adelaide, Adelaide, South Australia 5005, Australia; <sup>d</sup>Geoscience, Australian Museum, Sydney, NSW 2010, Australia; <sup>e</sup>PANGAEA Research Centre, School of Biological, Earth and Environmental Sciences, UNSW Kensington, NSW 2052, Australia

e-mail: robin.offler@newcastle.edu.au

Received 25 February 2019; accepted 22 April 2019

R. Offler <https://orcid.org/0000-0003-2100-8901>

H. Zwingmann <https://orcid.org/0000-0002-7911-462X>

J. Foden <https://orcid.org/0000-0003-3564-7253>

F. L. Sutherland <https://orcid.org/0000-0002-7700-411X>

I. T. Graham <https://orcid.org/0000-0001-9112-0865>

### SUPPLEMENTARY PAPERS

*Australian Journal of Earth Sciences* (2020) 67, [doi:10.1080/08120099.2019.1614997](https://doi.org/10.1080/08120099.2019.1614997)

---

Copies of Supplementary Papers may be obtained from the Geological Society of Australia's website ([www.gsa.org.au](http://www.gsa.org.au)), the Australian Journal of Earth Sciences website ([www.ajes.com.au](http://www.ajes.com.au)) or from the National Library of Australia's Pandora archive (<https://pandora.nla.gov.au/tep/150555>).

---

### Supplementary paper

Table S1. Whole-rock analyses of dykes from the Sydney Basin and Tamworth Belt. (excel file)
